# Supplementary material
Source: HighWire-hosted journal article supplement (https://bmjopen.bmj.com/content/9/8/e027215)
Supplement: inline-supplementary-material-1 [file inline-supplementary-material-1.pdf]

## Supplement materials

**S1. table** Age-specific height reference value for Chinese boys aged 7 to 17 years (cm)

| Age | Height percentile     |                        |                        |                        |                        |                        |                        |
|-----|-----------------------|------------------------|------------------------|------------------------|------------------------|------------------------|------------------------|
|     | <i>P</i> <sub>5</sub> | <i>P</i> <sub>10</sub> | <i>P</i> <sub>25</sub> | <i>P</i> <sub>50</sub> | <i>P</i> <sub>75</sub> | <i>P</i> <sub>90</sub> | <i>P</i> <sub>95</sub> |
| 7   | 115.7                 | 117.9                  | 121.5                  | 125.5                  | 129.5                  | 133.3                  | 135.4                  |
| 8   | 120.6                 | 122.9                  | 126.5                  | 130.7                  | 134.9                  | 138.7                  | 141.0                  |
| 9   | 125.0                 | 127.4                  | 131.4                  | 135.8                  | 140.3                  | 144.2                  | 146.6                  |
| 10  | 130.0                 | 132.1                  | 136.1                  | 140.8                  | 145.4                  | 149.8                  | 152.4                  |
| 11  | 133.7                 | 136.4                  | 141.0                  | 146.0                  | 151.3                  | 156.5                  | 159.7                  |
| 12  | 138.4                 | 141.2                  | 146.0                  | 152.0                  | 158.6                  | 164.1                  | 167.3                  |
| 13  | 145.1                 | 148.2                  | 154.0                  | 160.2                  | 166.2                  | 170.7                  | 173.4                  |
| 14  | 151.6                 | 155.0                  | 160.4                  | 165.7                  | 170.5                  | 175.0                  | 177.5                  |
| 15  | 157.2                 | 160.0                  | 164.4                  | 169.0                  | 173.4                  | 177.4                  | 180.0                  |
| 16  | 160.0                 | 162.4                  | 166.3                  | 170.5                  | 174.9                  | 178.8                  | 181.0                  |
| 17  | 161.2                 | 163.3                  | 167.1                  | 171.4                  | 175.6                  | 179.5                  | 181.9                  |

**S2. table** Age-specific height reference value for Chinese girls aged 7 to 17 years (cm)

| Age | Height percentile     |                        |                        |                        |                        |                        |                        |
|-----|-----------------------|------------------------|------------------------|------------------------|------------------------|------------------------|------------------------|
|     | <i>P</i> <sub>5</sub> | <i>P</i> <sub>10</sub> | <i>P</i> <sub>25</sub> | <i>P</i> <sub>50</sub> | <i>P</i> <sub>75</sub> | <i>P</i> <sub>90</sub> | <i>P</i> <sub>95</sub> |
| 7   | 114.3                 | 116.5                  | 120.1                  | 124.1                  | 128.1                  | 131.9                  | 134.0                  |
| 8   | 119.2                 | 121.5                  | 125.2                  | 129.3                  | 133.6                  | 137.2                  | 139.6                  |
| 9   | 124.0                 | 126.4                  | 130.3                  | 135.0                  | 139.6                  | 143.9                  | 146.5                  |
| 10  | 129.1                 | 131.8                  | 136.0                  | 141.2                  | 146.3                  | 150.7                  | 153.3                  |
| 11  | 134.2                 | 137.1                  | 142.0                  | 147.3                  | 152.7                  | 157.1                  | 159.6                  |
| 12  | 139.7                 | 142.6                  | 147.5                  | 152.5                  | 157.1                  | 160.9                  | 163.5                  |
| 13  | 145.6                 | 148.0                  | 152.0                  | 156.1                  | 160.0                  | 163.8                  | 166.0                  |
| 14  | 148.2                 | 150.4                  | 154.0                  | 157.8                  | 161.6                  | 165.1                  | 167.2                  |
| 15  | 149.2                 | 151.4                  | 154.8                  | 158.4                  | 162.2                  | 166.0                  | 168.0                  |
| 16  | 150.0                 | 151.7                  | 155.2                  | 159.0                  | 162.8                  | 166.3                  | 168.3                  |
| 17  | 150.1                 | 152.0                  | 155.3                  | 159.2                  | 163.1                  | 166.6                  | 168.8                  |

**S3. table** Percentiles of Blood Pressure Levels for Boys by Age and Height (mmHg)

| Age | Blood | Systolic pressure | Diastolic pressure |
|-----|-------|-------------------|--------------------|
|-----|-------|-------------------|--------------------|

| pressure percentile e | Height percentile |            |               |               |               |               |               |               | Height percentile |            |               |               |               |               |               |               |    |
|-----------------------|-------------------|------------|---------------|---------------|---------------|---------------|---------------|---------------|-------------------|------------|---------------|---------------|---------------|---------------|---------------|---------------|----|
|                       | $< P_5$           | $\geq P_5$ | $\geq P_{10}$ | $\geq P_{25}$ | $\geq P_{50}$ | $\geq P_{75}$ | $\geq P_{90}$ | $\geq P_{95}$ | $< P_5$           | $\geq P_5$ | $\geq P_{10}$ | $\geq P_{25}$ | $\geq P_{50}$ | $\geq P_{75}$ | $\geq P_{90}$ | $\geq P_{95}$ |    |
|                       |                   |            |               |               |               |               |               |               |                   |            |               |               |               |               |               |               |    |
| 7                     | $P_{95}$          | 108        | 110           | 112           | 113           | 115           | 117           | 118           | 121               | 72         | 74            | 74            | 74            | 75            | 77            | 78            | 79 |
| 8                     | $P_{95}$          | 110        | 112           | 113           | 115           | 117           | 119           | 120           | 124               | 73         | 75            | 75            | 76            | 76            | 78            | 80            | 80 |
| 9                     | $P_{95}$          | 112        | 114           | 114           | 117           | 119           | 121           | 122           | 126               | 74         | 76            | 76            | 77            | 77            | 79            | 81            | 81 |
| 10                    | $P_{95}$          | 113        | 115           | 116           | 119           | 121           | 123           | 125           | 129               | 75         | 76            | 76            | 78            | 78            | 80            | 81            | 82 |
| 11                    | $P_{95}$          | 115        | 116           | 117           | 120           | 123           | 126           | 128           | 131               | 76         | 77            | 77            | 79            | 79            | 81            | 81            | 82 |
| 12                    | $P_{95}$          | 116        | 117           | 119           | 122           | 125           | 128           | 130           | 133               | 77         | 77            | 78            | 79            | 80            | 81            | 82            | 83 |
| 13                    | $P_{95}$          | 117        | 119           | 122           | 125           | 127           | 130           | 132           | 134               | 78         | 78            | 79            | 80            | 81            | 82            | 82            | 83 |
| 14                    | $P_{95}$          | 120        | 122           | 125           | 128           | 129           | 131           | 133           | 135               | 79         | 79            | 80            | 81            | 82            | 83            | 83            | 84 |
| 15                    | $P_{95}$          | 123        | 126           | 128           | 130           | 131           | 132           | 133           | 136               | 80         | 80            | 82            | 82            | 83            | 83            | 83            | 84 |
| 16                    | $P_{95}$          | 127        | 129           | 130           | 131           | 132           | 133           | 134           | 136               | 81         | 82            | 83            | 83            | 84            | 84            | 84            | 85 |
| 17                    | $P_{95}$          | 129        | 131           | 131           | 132           | 133           | 134           | 135           | 136               | 82         | 83            | 84            | 84            | 85            | 85            | 85            | 86 |

**S4. table** Percentiles of Blood Pressure Levels for girls by Age and Height (mmHg)

| Age | Blood pressure percentile e | Systolic pressure |            |               |            |            |            |            |            | Diastolic pressure |            |               |            |            |            |            |            |
|-----|-----------------------------|-------------------|------------|---------------|------------|------------|------------|------------|------------|--------------------|------------|---------------|------------|------------|------------|------------|------------|
|     |                             | Height percentile |            |               |            |            |            |            |            | Height percentile  |            |               |            |            |            |            |            |
|     |                             | $< P_5$           | $\geq P_5$ | $\geq P_{10}$ | $\geq P_2$ | $\geq P_5$ | $\geq P_7$ | $\geq P_9$ | $\geq P_9$ | $< P_5$            | $\geq P_5$ | $\geq P_{10}$ | $\geq P_2$ | $\geq P_5$ | $\geq P_7$ | $\geq P_9$ | $\geq P_9$ |
| 7   | $P_{95}$                    | 109               | 109        | 111           | 111        | 113        | 115        | 117        | 121        | 73                 | 73         | 74            | 74         | 74         | 75         | 76         | 77         |
| 8   | $P_{95}$                    | 110               | 110        | 113           | 113        | 115        | 117        | 119        | 123        | 74                 | 74         | 75            | 75         | 76         | 77         | 78         | 78         |
| 9   | $P_{95}$                    | 112               | 112        | 114           | 115        | 117        | 119        | 121        | 124        | 75                 | 76         | 76            | 77         | 77         | 78         | 79         | 81         |
| 10  | $P_{95}$                    | 113               | 114        | 116           | 117        | 119        | 121        | 123        | 125        | 77                 | 77         | 78            | 78         | 79         | 79         | 80         | 81         |
| 11  | $P_{95}$                    | 115               | 116        | 117           | 119        | 121        | 123        | 124        | 126        | 78                 | 78         | 79            | 79         | 79         | 80         | 81         | 81         |
| 12  | $P_{95}$                    | 116               | 117        | 119           | 121        | 122        | 124        | 125        | 126        | 79                 | 79         | 79            | 80         | 80         | 80         | 81         | 81         |
| 13  | $P_{95}$                    | 118               | 119        | 120           | 122        | 123        | 124        | 125        | 126        | 79                 | 79         | 80            | 80         | 80         | 80         | 81         | 81         |
| 14  | $P_{95}$                    | 120               | 120        | 121           | 122        | 123        | 124        | 125        | 126        | 80                 | 80         | 80            | 80         | 80         | 80         | 81         | 81         |
| 15  | $P_{95}$                    | 122               | 121        | 122           | 123        | 123        | 124        | 126        | 126        | 80                 | 80         | 80            | 80         | 80         | 81         | 82         | 82         |
| 16  | $P_{95}$                    | 122               | 122        | 122           | 123        | 123        | 125        | 126        | 126        | 80                 | 80         | 80            | 80         | 81         | 81         | 82         | 82         |
| 17  | $P_{95}$                    | 122               | 122        | 123           | 124        | 124        | 125        | 126        | 126        | 80                 | 80         | 81            | 81         | 81         | 81         | 82         | 82         |

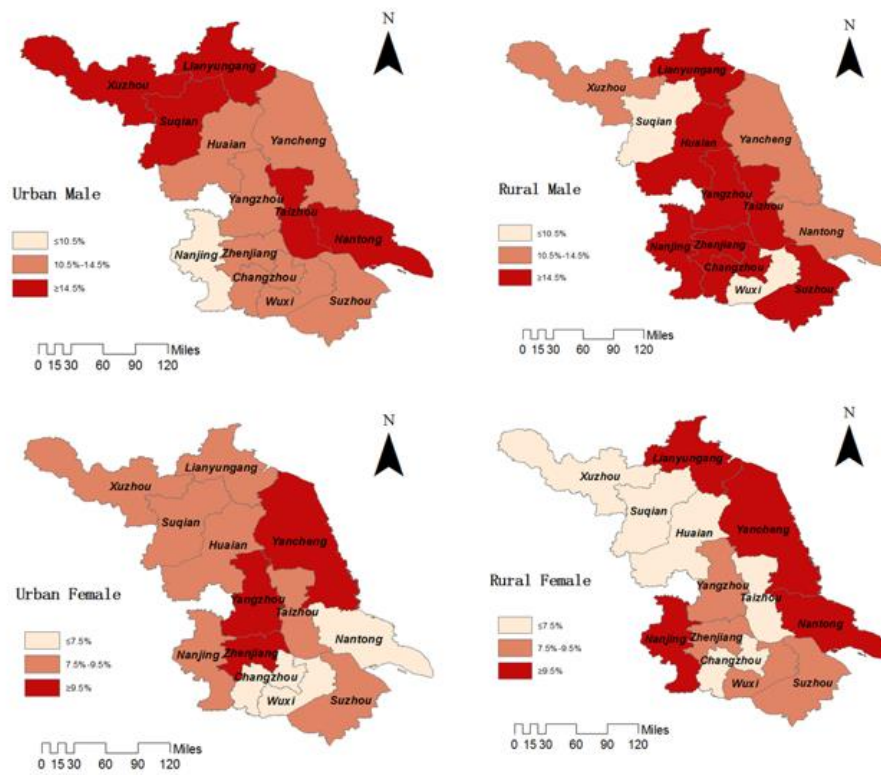

**S1. figure** Region distribution of obesity among middle school students aged 12-17 years in Jiangsu Province, 2017-2018
